# Supplementary material for: Denosumab for Elderly Men with Osteoporosis: A Cost-Effectiveness Analysis from the US Payer Perspective
Source: Hindawi journal article supplement (doi:10.1155/2015/627631), 2015-01-01
Supplement: f1 [file 627631.f1.pdf]

## Supplement

**Supplemental Table 1. Discontinuation Rates**

| Time Point (Years) | Oral treatments <sup>*</sup> | Injectables <sup>†</sup> |
|--------------------|------------------------------|--------------------------|
| 0.5                | 27.4%                        | 13.7%                    |
| 1                  | 29.3%                        | 14.7%                    |
| 1.5                | 23.7%                        | 11.8%                    |
| 2                  | 23.0%                        | 11.5%                    |
| 2.5                | 30.8%                        | 15.4%                    |
| 3                  | 25.9%                        | 12.9%                    |

<sup>\*</sup>Includes alendronate, risedronate, and ibandronate

<sup>†</sup>Includes denosumab, teriparatide, and zoledronate

**Supplemental Table 2. Relative Risk of Mortality Compared to Normal Male Population**

| Age          | 1 <sup>st</sup> year after hip fracture | 1st year after clinical vertebral fracture | 2+ years after hip fracture | 2+ years after clinical vertebral fracture | NHNV |
|--------------|-----------------------------------------|--------------------------------------------|-----------------------------|--------------------------------------------|------|
| <b>75-79</b> | 5.14                                    | 5.46                                       | 4.54                        | 3.75                                       | 5.07 |
| <b>80-84</b> | 3.91                                    | 3.73                                       | 3.45                        | 2.56                                       | 4.06 |
| <b>85-89</b> | 2.32                                    | 2.36                                       | 2.05                        | 1.63                                       | 2.51 |
| <b>90-94</b> | 1.49                                    | 1.62                                       | 1.21                        | 1.12                                       | 1.62 |

Note: Not adjusted for comorbidities

Source: Johnell et al. 2004 [36]
